# Supplementary material for: The evolution of animal Argonautes: evidence for the absence of antiviral AGO Argonautes in vertebrates
Source: PubMed Central journal article supplement (PMC5569025; doi:10.1038/s41598-017-08043-5), 2017-08-23
Supplement: 41598_2017_8043_MOESM1_ESM.pdf [file 41598_2017_8043_MOESM1_ESM.pdf]

**The evolution of animal Argonautes: evidence for the absence of antiviral  
AGO Argonautes in vertebrates**

Niels Wynant\*, Dulce Santos and Jozef Vanden Broeck

Molecular Developmental Physiology and Signal Transduction, KU Leuven, Naamsestraat 59,  
P.O. Box 02465, B-3000 Leuven, Belgium.

\* Corresponding author: E-mail address: [Niels.Wynant@kuleuven.be](mailto:Niels.Wynant@kuleuven.be)

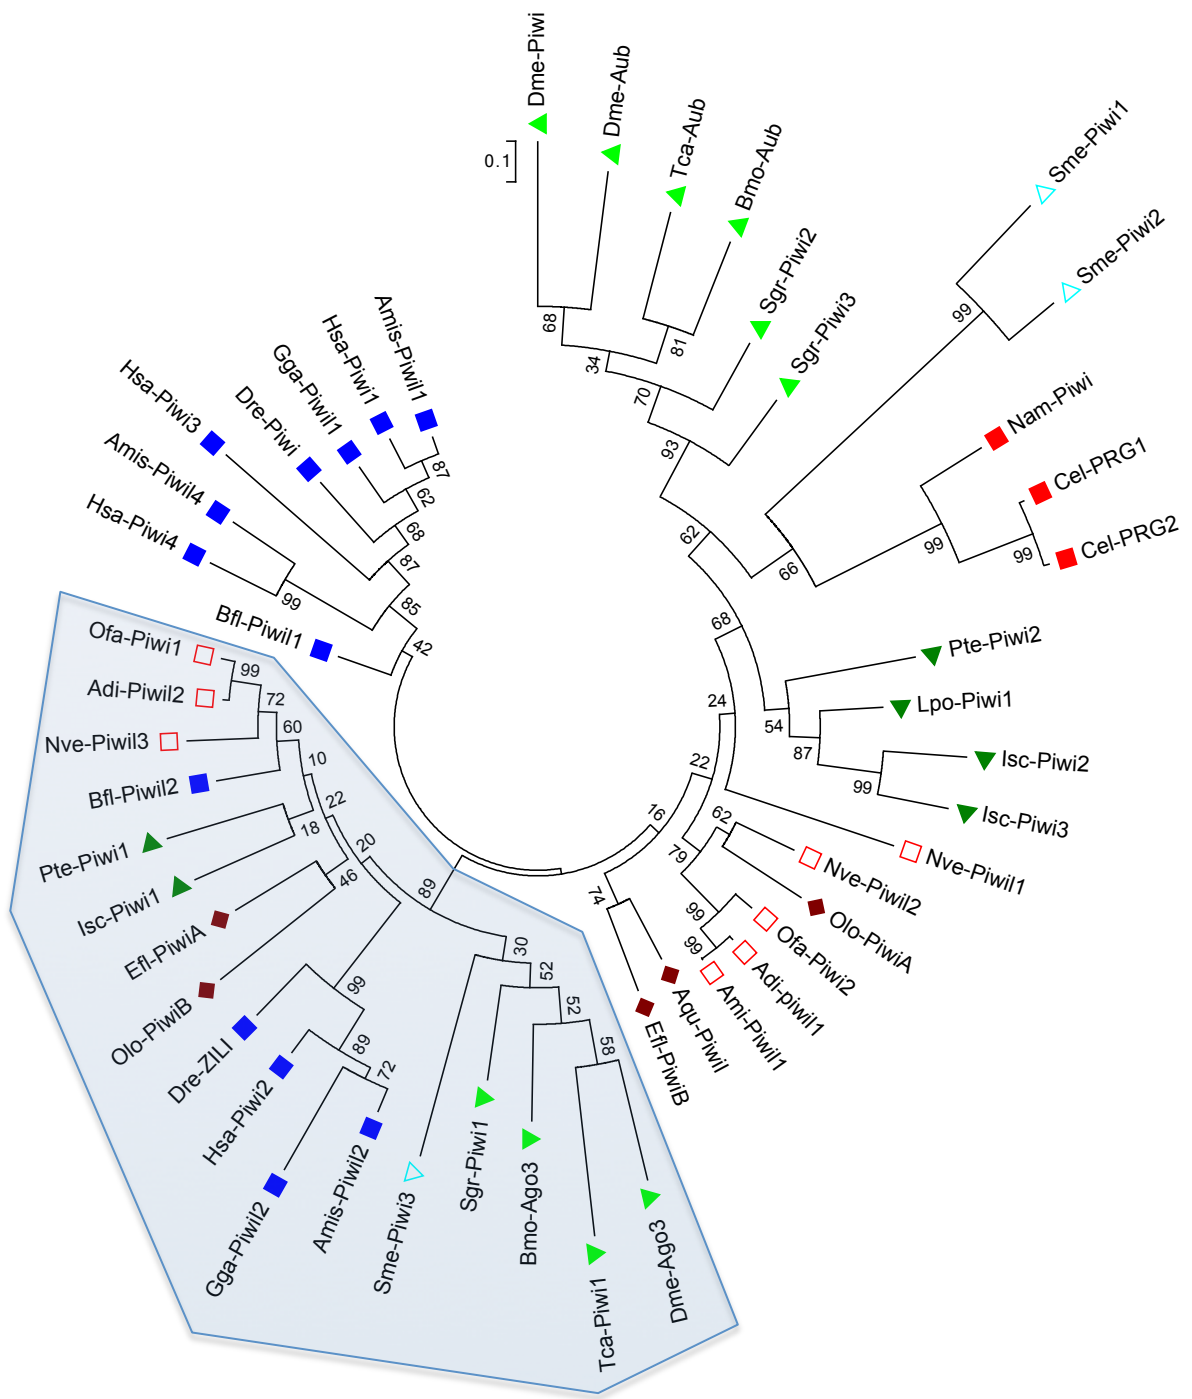

Supplementary Figure S1, related to Figure 1

| <u>Description</u>                                                         | <u>Max score</u> | <u>Total score</u> | <u>Query cover</u> | <u>E value</u> | <u>Identity</u> | <u>Accession n°</u>            | <u>Ago-type</u> |
|----------------------------------------------------------------------------|------------------|--------------------|--------------------|----------------|-----------------|--------------------------------|-----------------|
| <a href="#">Bf-AGO2; Branchiostoma floridae hypothetical protein. mRNA</a> | 388              | 388                | 61%                | 1.00E-115      | 35%             | <a href="#">XM_002589997.1</a> | miRNA-class AGO |

Supplementary Table S1, related to Figure 1

| Phylum      | class                          | order                          | species                           | gene name                      | Accession number               | Argonaute-type*                |            |                                |                 |                               |          |                                |                 |
|-------------|--------------------------------|--------------------------------|-----------------------------------|--------------------------------|--------------------------------|--------------------------------|------------|--------------------------------|-----------------|-------------------------------|----------|--------------------------------|-----------------|
| Chordata    | Mammalia                       | Primates                       | <i>Homo sapiens</i>               | Hsa-Ago1                       | <a href="#">NM_012199.4</a>    | miRNA-class AGO                |            |                                |                 |                               |          |                                |                 |
|             |                                |                                |                                   | Hsa-Ago2                       | <a href="#">XM_011516968.2</a> | miRNA-class AGO                |            |                                |                 |                               |          |                                |                 |
|             |                                |                                |                                   | Hsa-Ago3                       | <a href="#">NM_177422.2</a>    | miRNA-class AGO                |            |                                |                 |                               |          |                                |                 |
|             |                                |                                |                                   | Hsa-Ago4                       | <a href="#">XM_011540884.2</a> | miRNA-class AGO                |            |                                |                 |                               |          |                                |                 |
|             |                                |                                |                                   | Hsa-piwil1                     | <a href="#">XM_017020229.1</a> | PIWI                           |            |                                |                 |                               |          |                                |                 |
|             |                                |                                |                                   | Hsa-piwil2                     | <a href="#">NM_001135721.1</a> | PIWI                           |            |                                |                 |                               |          |                                |                 |
|             |                                |                                |                                   | Hsa-piwil3                     | <a href="#">NM_001008496.3</a> | PIWI                           |            |                                |                 |                               |          |                                |                 |
|             |                                |                                |                                   | Hsa-piwil4                     | <a href="#">NM_152431.2</a>    | PIWI                           |            |                                |                 |                               |          |                                |                 |
|             | Reptila                        | Crocodilla                     | <i>Alligator mississippiensis</i> | Amis-Ago1                      | <a href="#">XM_006269876.3</a> | miRNA-class AGO                |            |                                |                 |                               |          |                                |                 |
|             |                                |                                |                                   | Amis-Ago2                      | <a href="#">XM_006258700.3</a> | miRNA-class AGO                |            |                                |                 |                               |          |                                |                 |
|             |                                |                                |                                   | Aism-Ago3                      | <a href="#">XR_002090536.1</a> | miRNA-class AGO                |            |                                |                 |                               |          |                                |                 |
|             |                                |                                |                                   | Aism-Ago4                      | <a href="#">XM_006269875.3</a> | miRNA-class AGO                |            |                                |                 |                               |          |                                |                 |
|             |                                |                                |                                   | Amis-Piwil1                    | <a href="#">XM_019486674.1</a> | PIWI                           |            |                                |                 |                               |          |                                |                 |
|             |                                |                                |                                   | Amis-Piwil2                    | <a href="#">XM_019491533.1</a> | PIWI                           |            |                                |                 |                               |          |                                |                 |
|             |                                |                                |                                   | Amis-Piwil4                    | <a href="#">XM_006018646.1</a> | PIWI                           |            |                                |                 |                               |          |                                |                 |
|             |                                |                                |                                   | Aves                           | Galliformes                    | <i>Gallus gallus</i>           | Gga-Ago1   | <a href="#">NM_001317212.1</a> | miRNA-class AGO |                               |          |                                |                 |
|             | Gga-Ago3                       | <a href="#">NM_001030900.1</a> | miRNA-class AGO                   |                                |                                |                                |            |                                |                 |                               |          |                                |                 |
|             | Gga-Ago4                       | <a href="#">NM_001039276.1</a> | miRNA-class AGO                   |                                |                                |                                |            |                                |                 |                               |          |                                |                 |
|             | Gag-Piwil1                     | <a href="#">XM_015275263.1</a> | PIWI                              |                                |                                |                                |            |                                |                 |                               |          |                                |                 |
|             | Gga-Piwil2                     | <a href="#">XM_015273687.1</a> | PIWI                              |                                |                                |                                |            |                                |                 |                               |          |                                |                 |
|             | Actinopterygii                 | Cypriniformes                  | <i>Danio rerio</i>                |                                |                                |                                | Dre-Ago1   | <a href="#">XM_005158472.3</a> | miRNA-class AGO |                               |          |                                |                 |
|             |                                |                                |                                   | Dre-Ago2                       | <a href="#">XM_009294368.2</a> | miRNA-class AGO                |            |                                |                 |                               |          |                                |                 |
|             |                                |                                |                                   | Dre-Ago3                       | <a href="#">XM_005159456.2</a> | miRNA-class AGO                |            |                                |                 |                               |          |                                |                 |
|             |                                |                                |                                   | Dre-Ago4                       | <a href="#">NM_001252559.2</a> | miRNA-class AGO                |            |                                |                 |                               |          |                                |                 |
|             |                                |                                |                                   | Dre-ZILI                       | <a href="#">FJ168029.1</a>     | PIWI                           |            |                                |                 |                               |          |                                |                 |
|             |                                |                                |                                   | Dre-PIWIL1                     | <a href="#">NM_183338.1</a>    | PIWI                           |            |                                |                 |                               |          |                                |                 |
|             |                                |                                |                                   | Leptocardii                    | Amphioxiformes                 | <i>Branchiostoma floridae</i>  | Bfl-AGO1   | <a href="#">XM_002589344.1</a> | miRNA-class AGO |                               |          |                                |                 |
|             |                                |                                |                                   |                                |                                |                                | Bfl-AGO2   | <a href="#">XM_002589997.1</a> | miRNA-class AGO |                               |          |                                |                 |
|             |                                |                                |                                   |                                |                                |                                | Bfl-Piwil1 | <a href="#">KC516709.1</a>     | PIWI            |                               |          |                                |                 |
|             |                                |                                |                                   |                                |                                |                                | Bfl-Piwil2 | <a href="#">KC516710.1</a>     | PIWI            |                               |          |                                |                 |
|             |                                |                                |                                   |                                |                                |                                | Nematoda   | Chromadorea                    | Rhabditidae     | <i>Caenorhabditis elegans</i> | Cel-Alg1 | <a href="#">NM_001270310.1</a> | miRNA-class AGO |
|             |                                |                                |                                   |                                |                                |                                |            |                                |                 |                               | Cel-Alg2 | <a href="#">NM_061436.3</a>    | miRNA-class AGO |
|             | Cel-Ergo1                      | <a href="#">NM_070961.7</a>    | siRNA-class AGO                   |                                |                                |                                |            |                                |                 |                               |          |                                |                 |
|             | Cel-Rde1                       | <a href="#">NM_171525.4</a>    | siRNA-class AGO                   |                                |                                |                                |            |                                |                 |                               |          |                                |                 |
|             | Cel-SAGO1                      | <a href="#">NM_072209.3</a>    | WAGO                              |                                |                                |                                |            |                                |                 |                               |          |                                |                 |
|             | Cel-SAGO2                      | <a href="#">NM_182059.3</a>    | WAGO                              |                                |                                |                                |            |                                |                 |                               |          |                                |                 |
|             | Cel-WAGO1                      | <a href="#">NM_059644.5</a>    | WAGO                              |                                |                                |                                |            |                                |                 |                               |          |                                |                 |
|             | Cel-WAGO2                      | <a href="#">F55A12.1</a>       | WAGO                              |                                |                                |                                |            |                                |                 |                               |          |                                |                 |
|             | Cel-PPW2                       | <a href="#">NM_059134.5</a>    | WAGO                              |                                |                                |                                |            |                                |                 |                               |          |                                |                 |
|             | Cel-CSR1                       | <a href="#">NM_001047473.3</a> | WAGO                              |                                |                                |                                |            |                                |                 |                               |          |                                |                 |
| Cel-Hpo24   | <a href="#">NM_060242.4</a>    | Hpo24-like*                    |                                   |                                |                                |                                |            |                                |                 |                               |          |                                |                 |
| Cel-Alg3/4  | <a href="#">NM_066791.4</a>    | alg3/4-like*                   |                                   |                                |                                |                                |            |                                |                 |                               |          |                                |                 |
| Cel-PRG1    | <a href="#">NM_059720.5</a>    | PIWI                           |                                   |                                |                                |                                |            |                                |                 |                               |          |                                |                 |
| Cel-PRG2    | <a href="#">NM_068593.6</a>    | Piwi                           |                                   |                                |                                |                                |            |                                |                 |                               |          |                                |                 |
| Ascaridia   | <i>Ascaris suum</i>            | Asu-Alg1                       | <a href="#">HQ611964.1</a>        | miRNA-class AGO                |                                |                                |            |                                |                 |                               |          |                                |                 |
|             |                                | Asu-ALG7                       | <a href="#">HQ611968.1</a>        | siRNA-class AGO                |                                |                                |            |                                |                 |                               |          |                                |                 |
|             |                                | Asu-ALG5                       | <a href="#">HQ611966.1</a>        | siRNA-class AGO                |                                |                                |            |                                |                 |                               |          |                                |                 |
|             |                                | Asu-ALG6                       | <a href="#">HQ611967.1</a>        | Hpo-like*                      |                                |                                |            |                                |                 |                               |          |                                |                 |
|             |                                | Asu-ALG4                       | <a href="#">HQ611965.1</a>        | alg3-like*                     |                                |                                |            |                                |                 |                               |          |                                |                 |
|             |                                | Asu-WAGO                       | <a href="#">HQ611970.1</a>        | WAGO                           |                                |                                |            |                                |                 |                               |          |                                |                 |
|             |                                | Asu-WAGO2                      | <a href="#">HQ611971.1</a>        | WAGO                           |                                |                                |            |                                |                 |                               |          |                                |                 |
|             |                                | Asu-WAGO3                      | <a href="#">HQ611972.1</a>        | WAGO                           |                                |                                |            |                                |                 |                               |          |                                |                 |
|             |                                | Asu-CSR1                       | <a href="#">HQ611969.1</a>        | WAGO                           |                                |                                |            |                                |                 |                               |          |                                |                 |
|             |                                | Asu-NRDE3                      | <a href="#">HQ611973.1</a>        | WAGO                           |                                |                                |            |                                |                 |                               |          |                                |                 |
|             |                                | Secernentea                    | Spiurida                          | <i>Brugia malayi</i>           | Bma-Alg1                       | <a href="#">XM_001894221.1</a> |            | miRNA-class AGO                |                 |                               |          |                                |                 |
|             |                                |                                |                                   |                                | Bma-Alg2                       | <a href="#">XM_001894221.1</a> |            | miRNA-class AGO                |                 |                               |          |                                |                 |
| Bma-Rde1    | <a href="#">XM_001898588.1</a> |                                |                                   |                                | siRNA-class AGO                |                                |            |                                |                 |                               |          |                                |                 |
| Bma-Alg3    | <a href="#">XM_001891898.1</a> |                                |                                   |                                | alg3/4-like*                   |                                |            |                                |                 |                               |          |                                |                 |
| Bma-NRDE3   | <a href="#">XM_001900278.1</a> |                                |                                   |                                | WAGO                           |                                |            |                                |                 |                               |          |                                |                 |
| Bma-WAGO2   | <a href="#">XM_001895162.1</a> |                                |                                   |                                | WAGO                           |                                |            |                                |                 |                               |          |                                |                 |
| Bma-WAGO1   | <a href="#">XM_001895162.1</a> |                                |                                   |                                | WAGO                           |                                |            |                                |                 |                               |          |                                |                 |
| Bma-CSR1    | <a href="#">XM_001901544.1</a> |                                |                                   |                                | WAGO                           |                                |            |                                |                 |                               |          |                                |                 |
| Strongylida | <i>Necator americanus</i>      |                                | Nam-ALG1                          | <a href="#">XM_013443759.1</a> | miRNA-class AGO                |                                |            |                                |                 |                               |          |                                |                 |
|             |                                |                                | Nam-RDE1-like                     | <a href="#">XM_013450933.1</a> | siRNA-class AGO                |                                |            |                                |                 |                               |          |                                |                 |
|             |                                |                                | Nma-WAGO1                         | <a href="#">XM_013451313.1</a> | WAGO                           |                                |            |                                |                 |                               |          |                                |                 |
|             |                                |                                | Nam-WAGO2                         | <a href="#">XM_013437700.1</a> | WAGO                           |                                |            |                                |                 |                               |          |                                |                 |
|             |                                |                                | Nam-PIWI                          | <a href="#">XM_013437264.1</a> | PIWI                           |                                |            |                                |                 |                               |          |                                |                 |

| Phylum                    | class                        | order                        | species                         | gene name                          | Accession number               | Argonaute-type*                |                 |
|---------------------------|------------------------------|------------------------------|---------------------------------|------------------------------------|--------------------------------|--------------------------------|-----------------|
| Arthropoda                | Insecta                      | Diptera                      | <i>Drosophila melanogaster</i>  | Dme-Ago1                           | <a href="#">NM_079010.4</a>    | miRNA-class AGO                |                 |
|                           |                              |                              |                                 | Dme-Ago2                           | <a href="#">NM_140518.3</a>    | siRNA-class AGO                |                 |
|                           |                              |                              |                                 | Dme-Ago3                           | <a href="#">NM_001043162.3</a> | PIWI                           |                 |
|                           |                              |                              |                                 | Dem-Piwi                           | <a href="#">AF104354.1</a>     | PIWI                           |                 |
|                           |                              |                              |                                 | Dme-Aub                            | <a href="#">NM_057386.5</a>    | PIWI                           |                 |
|                           |                              | Lepidoptera                  | <i>Bombyx mori</i>              | Bmo-Ago1                           | <a href="#">NM_001102461.1</a> | miRNA-class AGO                |                 |
|                           |                              |                              |                                 | Bmo-Ago2                           | <a href="#">XM_012693089.1</a> | siRNA-class AGO                |                 |
|                           |                              |                              |                                 | Bmo-Ago3                           | <a href="#">XM_012695095.1</a> | PIWI                           |                 |
|                           |                              |                              |                                 | Bmo-Aub                            | <a href="#">XM_012689822.1</a> | PIWI                           |                 |
|                           |                              |                              |                                 | Tca-Ago1                           | <a href="#">XM_015982502.1</a> | miRNA-class AGO                |                 |
|                           |                              | Coleoptera                   | <i>Tribolium castaneum</i>      | Tca-Ago2a                          | <a href="#">M_008202051.2</a>  | siRNA-class AGO                |                 |
|                           |                              |                              |                                 | Tca-Agob                           | <a href="#">XM_008194763.2</a> | siRNA-class AGO                |                 |
|                           |                              |                              |                                 | Tca-Piwi1                          | <a href="#">XM_008194203.2</a> | PIWI                           |                 |
|                           |                              |                              |                                 | Tca-Aub                            | <a href="#">XM_008198081.2</a> | PIWI                           |                 |
|                           |                              |                              |                                 | Sgr-Ago1                           | <a href="#">KY555621</a>       | miRNA-class AGO                |                 |
|                           | Orthoptera                   | <i>Schistocerca gregaria</i> | Sgr-Ago2                        | <a href="#">JX516788.1</a>         | siRNA-class AGO                |                                |                 |
|                           |                              |                              | Sgr-Piwi1                       | <a href="#">KY555624</a>           | PIWI                           |                                |                 |
|                           |                              |                              | Sgr-Piwi2                       | <a href="#">KY555622</a>           | PIWI                           |                                |                 |
|                           |                              |                              | Sgr-piwi3                       | <a href="#">KY555623</a>           | PIWI                           |                                |                 |
|                           |                              |                              | Isc-Ago1                        | <a href="#">XM_002413143.1</a>     | miRNA-class AGO                |                                |                 |
|                           | Arachnida                    | Ixodida                      | <i>Ixodes scapularis</i>        | Isc-Ago2                           | <a href="#">XM_002412215.1</a> | siRNA-class AGO                |                 |
|                           |                              |                              |                                 | Isc-Ago3                           | <a href="#">XM_002412954.1</a> | miRNA-class AGO                |                 |
|                           |                              |                              |                                 | Isc-Ago4                           | <a href="#">XM_002405620.1</a> | siRNA-class AGO                |                 |
|                           |                              |                              |                                 | Isc-Ago5                           | <a href="#">XM_002399349.1</a> | miRNA-class AGO                |                 |
|                           |                              |                              |                                 | Isc-Ago5                           | <a href="#">XM_002401346.1</a> | PIWI                           |                 |
|                           |                              |                              |                                 | Isc-Piwi1                          | <a href="#">XM_002413940.1</a> | PIWI                           |                 |
|                           |                              |                              |                                 | Isc-Piwi2                          | <a href="#">XM_002411725.1</a> | PIWI                           |                 |
|                           |                              |                              |                                 | Isc-Piwi3                          | <a href="#">XM_002399349.1</a> | PIWI                           |                 |
|                           |                              |                              |                                 | Pte-Ago1                           | <a href="#">XM_016050247.1</a> | miRNA-class AGO                |                 |
|                           |                              |                              |                                 | Pte-Ago2                           | <a href="#">XM_016050249.1</a> | siRNA-class AGO                |                 |
|                           |                              | Pte-Ago3                     | <a href="#">XM_016074512.1</a>  | miRNA-class AGO                    |                                |                                |                 |
|                           |                              | Pte-Ago4                     | <a href="#">XM_016050252.1</a>  | siRNA-class AGO                    |                                |                                |                 |
|                           |                              | Pte-Piwi1                    | <a href="#">XM_016048783.1</a>  | PIWI                               |                                |                                |                 |
|                           |                              | Pte-Piwi2                    | <a href="#">XM_016075529.1</a>  | PIWI                               |                                |                                |                 |
|                           |                              | Merostomata                  | Xiphosura                       | <i>Limulus polyphemus</i>          | Lpo-Ago1                       | <a href="#">XM_013931086.1</a> | miRNA-class AGO |
|                           |                              |                              |                                 |                                    | Lpo-Ago2                       | <a href="#">XM_013926285.1</a> | siRNA-class AGO |
|                           |                              |                              |                                 |                                    | Lpo-Piwi1                      | <a href="#">XM_013918768.1</a> | PIWI            |
|                           | Platyhelminthes              | Cestoda                      | Cyclophyllidea                  | <i>Echinococcus multilocularis</i> | Emu-Ago1                       | <a href="#">FN690741.1</a>     | miRNA-class AGO |
|                           |                              |                              |                                 |                                    | Emu-Ago2                       | <a href="#">KF768022.1</a>     | siRNA-class AGO |
|                           |                              | Trematoda                    | Stringeidida                    | <i>Schistosoma japonicum</i>       | Sja-Ago1                       | <a href="#">KC345759.1</a>     | miRNA-class AGO |
|                           |                              |                              |                                 |                                    | Sja-Ago2                       | <a href="#">KC345760.1</a>     | siRNA-class AGO |
|                           |                              |                              |                                 |                                    | Sja-Ago3                       | <a href="#">KC345761.1</a>     | siRNA-class AGO |
|                           |                              | Rhabditophora                | Tricladida                      | <i>Schmidtea mediterranea</i>      | Sme-Ago1                       | <a href="#">JF263459</a>       | miRNA-class AGO |
|                           |                              |                              |                                 |                                    | Sme-Piwi1                      | <a href="#">DQ186985.1</a>     | siRNA-class AGO |
|                           | Sme-Piwi2                    |                              |                                 |                                    | <a href="#">DQ186986.1</a>     | PIWI                           |                 |
|                           | Cnidaria                     | Anthozoa                     | Scleractinia                    | <i>Acropora digitifera</i>         | Adi-Ago1                       | <a href="#">XM_015896058.1</a> | miRNA-class AGO |
|                           |                              |                              |                                 |                                    | Adi-Ago2                       | <a href="#">XM_015896084.1</a> | siRNA-class AGO |
| Adi-Ago3                  |                              |                              |                                 |                                    | <a href="#">XM_015896077.1</a> | siRNA-class AGO                |                 |
| Adi-Ago4                  |                              |                              |                                 |                                    | <a href="#">XM_015896088.1</a> | siRNA-class AGO                |                 |
| Adi-Piwi1                 |                              |                              |                                 |                                    | <a href="#">XM_015921219.1</a> | PIWI                           |                 |
| Adi-Piwi2                 |                              |                              |                                 |                                    | <a href="#">XM_015908676.1</a> | PIWI                           |                 |
| <i>Acropora millipora</i> |                              |                              |                                 |                                    | Ami-Ago1                       | <a href="#">JR981312.1</a>     | miRNA-class AGO |
|                           |                              |                              |                                 |                                    | Ami-Ago2                       | <a href="#">JT022739.1</a>     | siRNA-class AGO |
|                           |                              |                              |                                 |                                    | Ami-Piwi1                      | <a href="#">EZ001072.1</a>     | PIWI            |
|                           |                              |                              |                                 |                                    | Ami-Piwi2                      | <a href="#">EZ012267.1</a>     | PIWI            |
|                           |                              | <i>Orbicella faveolata</i>   | Ofa-Ago1                        | <a href="#">XM_020761752.1</a>     | siRNA-class AGO                |                                |                 |
| Ofa-Ago2                  |                              |                              | <a href="#">XM_020761847.1</a>  | siRNA-class AGO                    |                                |                                |                 |
| Ofa-Ago3                  |                              |                              | <a href="#">XM_020761831.1</a>  | siRNA-class AGO                    |                                |                                |                 |
| Ofa-Piwi1                 |                              |                              | <a href="#">XM_020745504.1</a>  | PIWI                               |                                |                                |                 |
| Ofa-Piwi2                 |                              |                              | <a href="#">XM_020776165.1</a>  | PIWI                               |                                |                                |                 |
| Actiniaria                |                              | <i>Nemastella vectensis</i>  | Nve-Ago1                        | <a href="#">KF192061.1</a>         | miRNA-class AGO                |                                |                 |
|                           |                              |                              | Nve-Ago2                        | <a href="#">KF192062.1</a>         | siRNA-class AGO                |                                |                 |
|                           |                              |                              | Nve-Piwi1                       | <a href="#">KU746924.1</a>         | PIWI                           |                                |                 |
|                           |                              |                              | Nve-Piwi1                       | <a href="#">XM_001641944.1</a>     | PIWI                           |                                |                 |
|                           |                              |                              | Nve-Piwi1                       | <a href="#">XM_001626077.1</a>     | PIWI                           |                                |                 |
| Porifera                  | Demospongiae                 | Haplosclerida                | <i>Amphimedon queenslandica</i> | Aqu-Ago1                           | <a href="#">XM_019995499.1</a> | miRNA-class AGO                |                 |
|                           |                              |                              |                                 | Aqu-Ago2                           | <a href="#">XM_020008918.1</a> | siRNA-class AGO                |                 |
|                           |                              |                              |                                 | Aqu-Piwi1                          | <a href="#">XM_020007102.1</a> | PIWI                           |                 |
|                           |                              |                              |                                 | Efl-Ago                            | <a href="#">AB533507</a>       | miRNA-class AGO                |                 |
|                           |                              |                              |                                 | Efl-PiwiA                          | <a href="#">XM_020761752</a>   | PIWI                           |                 |
|                           | <i>Ephydatia fluviatilis</i> | Efl-PiwiB                    | <a href="#">XM_020761753</a>    | PIWI                               |                                |                                |                 |
|                           |                              | <i>Oscarella lobularis</i>   | Olo-Ago                         | <a href="#">KX216818.1</a>         | /                              |                                |                 |
|                           |                              |                              | Olo-PiwiA                       | <a href="#">KX216816.1</a>         | PIWI                           |                                |                 |
|                           |                              |                              | Olo-PiwiB                       | <a href="#">KX216817.1</a>         | PIWI                           |                                |                 |
|                           |                              |                              | Bacteroidetes                   | Bacteroidetes                      | Bacteroidales                  | <i>Bacteroides fragilis</i>    | OUT-GROUP       |
| Firmicutes                | Bacilli                      |                              |                                 |                                    |                                |                                | Bacillales      |

Supplementary Table S2, related to Figure 1.

### Legends:

Figure S1: Unrooted maximum likelihood phylogenetic tree (100 bootstraps) using the AGO Argonaute members belonging to Porifera (sponges; ) , Cnidaria (jellyfish, coral animals and anemones, ) , Chordata ( ) , Nematoda ( ) , Arthropoda (Insecta:  and Chelicerata: ) and Platyhelminthes ( ) .

Table S1: *Branchiostoma floridae* Bf-AGO2 is the chordate sequence with highest sequence similarity (depicted by lowest E-value) to *Drosophila melanogaster* Dm-AGO2.

Table S2: Detailed sequence information of the Argonaute sequences used for the construction of a Maximum Likelihood (ML-) phylogenetic tree.
